# Supplementary material for: Long‐term survival of nonlocalized epithelial ovarian cancer among women using menopausal hormone therapy prior to diagnosis: The extreme study
Source: PubMed Central journal article supplement — Int J Cancer. 2022 Jul 11;151(9):1512–22. doi: 10.1002/ijc.34171 (PMC9541581; doi:10.1002/ijc.34171), 2022-07-11
Supplement: IJC-151-1512-s001.pdf [file IJC-151-1512-s001.pdf]

# Long-term survival of non-localized epithelial ovarian cancer among women using menopausal hormone therapy prior to diagnosis - the Extreme study

Louise Baandrup, Michael Galanakis, Charlotte Gerd Hannibal, Christian Dehlendorff, Rasmus Hertzum-Larsen, Lina Steinrud Mørch, and Susanne K. Kjaer

## Table of contents

**Supplementary Table S1.** Classification of epithelial ovarian and fallopian tube cancer cases occurring in the Danish Cancer Registry and/or the Danish Pathology Registry 1978–2014

**Supplementary Table S2.** Classification of menopausal hormone therapy in the Danish Prescription Registry

**Supplementary Table S3.** Codes defining comorbidity

**Supplementary Table S4.** Characteristics of the study cohort of women 2005–2014 with non-localized epithelial ovarian cancer (N=2,207)

**Supplementary Table S5.** Ever use of prediagnostic menopausal hormone therapy (MHT) prior to diagnosis of non-localized epithelial ovarian and fallopian tube cancer and 5- and 10-year relative survival probabilities. The analysis is stratified by postdiagnostic menopausal hormone therapy use during the first year after diagnosis and restricted to women surviving minimum one year

**Supplementary Table S6.** Ever use of prediagnostic menopausal hormone therapy (MHT) prior to diagnosis of non-localized epithelial ovarian and fallopian tube cancer and 5- and 10-year relative survival probabilities. The analysis is restricted to the study population 2005–2014 and with additional adjustment for smoking and body mass index (BMI)

**Supplementary Table S1.** Classification of epithelial ovarian and fallopian tube cancer cases occurring in the Danish Cancer Registry and/or the Danish Pathology Registry 1978–2014

| <b>Histologic type</b>                     | <b>Morphology codes (ICD-O-3 and SNOMED)</b>                                                                                                                                                                                          |
|--------------------------------------------|---------------------------------------------------------------------------------------------------------------------------------------------------------------------------------------------------------------------------------------|
| Serous including papillary adenocarcinomas | 80503; 82603; 84413; 84503; 84603; 84613; 90143                                                                                                                                                                                       |
| Mucinous                                   | 84703; 84713; 84803; 84813; 84903; 90153                                                                                                                                                                                              |
| Endometrioid                               | 83803; 83813; 85703                                                                                                                                                                                                                   |
| Clear cell                                 | 83103; 83133                                                                                                                                                                                                                          |
| Other adenocarcinomas                      | 81403; 81413; 81433; 81443; 83233; 83843; 84403; 84743; 85713; 91103                                                                                                                                                                  |
| Others                                     | 80103; 80123; 80203; 80213; 80223; 80313; 80333; 80413; 80423; 80463; 80703; 80713; 80763; 80833; 80903; 81203; 81303; 82003; 82303; 82463; 82473; 82493; 83203; 85103; 85603; 85753; 89333; 89343; 89503; 89513; 89803; 89903; 90003 |

Abbreviations: ICD-O-3, the 3rd revision of the International Classification of Diseases for Oncology; SNOMED, the Systematized Nomenclature of Medicine.

**Supplementary Table S2.** Classification of menopausal hormone therapy in the Danish Prescription Registry

| <b>Regimen</b>                        | <b>Chemical content</b>                       | <b>ATC</b>                   |
|---------------------------------------|-----------------------------------------------|------------------------------|
| I. Systemic estrogen                  | Estradiol                                     | G03C A03                     |
|                                       | Estriol                                       | G03C A04                     |
|                                       |                                               | G03C A53                     |
|                                       | Conjugated estrogen                           | G03C A57                     |
| II. Systemic progestagen              | Norethisterone                                | G03D C02                     |
|                                       | Medroxyprogesterone acetate                   | G03D A02                     |
|                                       |                                               | G03D A04                     |
|                                       | Lynestrenol                                   | G03D C03                     |
| III. Systemic, combined cyclic        | Norethisterone acetate-estradiol              | G03F B05                     |
|                                       | Medroxyprogesterone acetate-estradiol valerat | G03F B06                     |
|                                       | Levonorgestrel-estradiol valerat              | G03F B01                     |
|                                       |                                               | G03F B09                     |
| IV. Systemic, combined continuous     | Norethisterone acetate-estradiol              | G03F A01                     |
|                                       | Medroxyprogesterone acetate-estradiol valerat | G03F A12                     |
|                                       | Tibolone                                      | G03D C05<br>(before 2008)    |
|                                       |                                               | G03C X01<br>(2008 and after) |
|                                       | Raloxifene                                    | G03X C01                     |
| V. Local, estrogen                    | Estradiol                                     | G03C A03                     |
|                                       | Estriol                                       | G03C A04                     |
|                                       | Conjugated estrogen                           | G03C A57                     |
|                                       | Dienestrol                                    | G03C B01                     |
| VI. Intrauterine devices, progestagen | Levonorgestrel                                | G02B A03                     |

---

**Supplementary Table S3.** Codes defining comorbidity

---

|                                       | <b>ICD-8 (1977–1993)</b>                          | <b>ICD-10 (since 1994)</b>   |
|---------------------------------------|---------------------------------------------------|------------------------------|
| Diabetes mellitus*                    | 249; 250                                          | DE10–DE14                    |
| Chronic obstructive pulmonary disease | 491–492                                           | DJ41–DJ44                    |
| Ischemic heart disease                | 410–414                                           | DI20–I25                     |
| Congestive heart disease              | 427.09; 427.10; 427.11;<br>427.19; 428.99; 782.49 | DI50; DI11.0; DI13.0; DI13.2 |
| Cerebrovascular disease               | 430–438                                           | DI60–DI69; DG45; DG46        |
| Atrial fibrillation                   | 427.93; 427.94                                    | DI48                         |

---

\*Diabetes mellitus was a composite measure of diagnosis and prescription for anti-diabetics drugs (ATC A10A; A10BB; A10BC; A10BD04; A10BD09; A10BF; A10BG; A10BH; A10BX).

---

**Supplementary Table S4.** Characteristics of the study cohort of women 2005–2014 with non-localized epithelial ovarian cancer (N=2,207)

|                                 | N     | %      |
|---------------------------------|-------|--------|
| Calendar year                   |       |        |
| 2005–2009                       | 1,129 | (51.2) |
| 2010–2014                       | 1,078 | (48.8) |
| Age at diagnosis (years)        |       |        |
| 50–59                           | 416   | (18.8) |
| 60–69                           | 764   | (34.6) |
| 70–79                           | 676   | (30.6) |
| ≥80                             | 351   | (15.9) |
| Histology                       |       |        |
| Serous                          | 1,510 | (68.4) |
| Mucinous                        | 47    | (2.1)  |
| Endometrioid                    | 73    | (3.3)  |
| Clear cell                      | 43    | (1.9)  |
| Other adenocarcinomas           | 383   | (17.4) |
| Others                          | 151   | (6.9)  |
| Use of MHT prior to diagnosis   |       |        |
| Non-use of MHT                  | 1,172 | (53.1) |
| Systemic ET                     | 415   | (18.8) |
| EPT                             | 553   | (25.1) |
| Other MHT                       | 67    | (3.0)  |
| Comorbidity                     |       |        |
| COPD                            | 131   | (5.9)  |
| Diabetes mellitus type I and II | 176   | (8.0)  |
| Cerebrovascular disease         | 162   | (7.3)  |
| Congestive heart disease        | 81    | (3.7)  |
| Atrial fibrillation             | 138   | (6.3)  |
| Ischemic heart disease          | 219   | (9.9)  |
| Income                          |       |        |
| Low                             | 462   | (20.9) |
| Medium                          | 770   | (34.9) |
| High                            | 975   | (44.2) |
| Residual disease                |       |        |
| Yes                             | 931   | (42.2) |
| No                              | 530   | (24.0) |
| Missing                         | 746   | (33.8) |
| Smoking                         |       |        |
| Previous smoker                 | 453   | (20.5) |
| Current smoker                  | 315   | (14.3) |

---

|                |       |        |
|----------------|-------|--------|
| Never smoker   | 968   | (43.9) |
| Missing        | 467   | (21.2) |
| BMI            |       |        |
| BMI registered | 1,847 | (83.7) |
| Missing        | 360   | (16.3) |

---

Abbreviations: BMI, body mass index; COPD, chronic obstructive pulmonary disease; EPT, estrogen plus progestin therapy; ET, estrogen therapy; MHT, menopausal hormone therapy.

---

**Supplementary Table S5.** Ever use of prediagnostic menopausal hormone therapy (MHT) prior to diagnosis of non-localized epithelial ovarian and fallopian tube cancer and 5- and 10-year relative survival probabilities. The analysis is stratified by postdiagnostic menopausal hormone therapy use during the first year after diagnosis and restricted to women surviving minimum one year.

|                           | Use of postdiagnostic MHT |                                              |                                              |                                             | Non-use of postdiagnostic MHT |                                              |                                              |                                             |
|---------------------------|---------------------------|----------------------------------------------|----------------------------------------------|---------------------------------------------|-------------------------------|----------------------------------------------|----------------------------------------------|---------------------------------------------|
|                           | N                         | Crude absolute survival probability (95% CI) | Adj. relative survival probability* (95% CI) | Adj. absolute survival difference* (95% CI) | N                             | Crude absolute survival probability (95% CI) | Adj. relative survival probability* (95% CI) | Adj. absolute survival difference* (95% CI) |
| <b>Pre-diagnostic use</b> |                           |                                              |                                              |                                             |                               |                                              |                                              |                                             |
| <b>5-year survival</b>    |                           |                                              |                                              |                                             |                               |                                              |                                              |                                             |
| Non-use of MHT            | 67                        | 0.37 (0.25–0.49)                             | Ref.                                         | Ref.                                        | 1,257                         | 0.24 (0.22–0.27)                             | Ref.                                         | Ref.                                        |
| Ever use of MHT           | 349                       | 0.31 (0.26–0.36)                             | 0.96 (0.68–1.36)                             | -0.02 (-0.15–0.11)                          | 822                           | 0.24 (0.21–0.26)                             | 0.96 (0.82–1.13)                             | -0.01 (-0.05–0.03)                          |
| Non-use of MHT            | 67                        | 0.37 (0.25–0.49)                             | Ref.                                         | Ref.                                        | 1,257                         | 0.24 (0.22–0.27)                             | Ref.                                         | Ref.                                        |
| Ever use of systemic ET   | 132                       | 0.30 (0.22–0.37)                             | 0.95 (0.62–1.46)                             | -0.01 (-0.15–0.14)                          | 303                           | 0.25 (0.20–0.30)                             | 1.13 (0.90–1.41)                             | 0.02 (-0.03–0.08)                           |
| Ever use of EPT           | 210                       | 0.32 (0.26–0.39)                             | 0.98 (0.69–1.39)                             | -0.02 (-0.16–0.11)                          | 452                           | 0.23 (0.19–0.27)                             | 0.89 (0.73–1.09)                             | -0.02 (-0.07–0.02)                          |
| Ever use of other MHT     | 7                         | 0.13 (-0.19–0.44)                            | 0.17 (0.00–6.38)                             | -0.23 (-0.60–0.14)                          | 67                            | 0.22 (0.12–0.32)                             | 0.86 (0.54–1.38)                             | -0.03 (-0.13–0.07)                          |
| <b>10-year survival</b>   |                           |                                              |                                              |                                             |                               |                                              |                                              |                                             |
| Non-use of MHT            | 67                        | 0.18 (0.07–0.30)                             | Ref.                                         | Ref.                                        | 1,257                         | 0.16 (0.13–0.18)                             | Ref.                                         | Ref.                                        |
| Ever use of MHT           | 349                       | 0.21 (0.16–0.26)                             | 1.14 (0.64–2.05)                             | 0.07 (-0.05–0.19)                           | 822                           | 0.13 (0.10–0.15)                             | 0.86 (0.68–1.09)                             | -0.03 (-0.06–0.01)                          |
| Non-use of MHT            | 67                        | 0.18 (0.07–0.30)                             | Ref.                                         | Ref.                                        | 1,257                         | 0.16 (0.13–0.18)                             | Ref.                                         | Ref.                                        |
| Ever use of systemic ET   | 132                       | 0.20 (0.12–0.27)                             | 1.09 (0.57–2.09)                             | 0.08 (-0.05–0.22)                           | 303                           | 0.14 (0.10–0.19)                             | 1.05 (0.77–1.45)                             | 0.00 (-0.04–0.05)                           |
| Ever use of EPT           | 210                       | 0.22 (0.16–0.29)                             | 1.12 (0.62–2.03)                             | 0.07 (-0.06–0.19)                           | 452                           | 0.12 (0.09–0.15)                             | 0.77 (0.57–1.04)                             | -0.04 (-0.08–0.01)                          |
| Ever use of other MHT     | 7                         | 0.15 (-0.19–0.48)                            | 0.35 (0.01–8.90)                             | -0.02 (-0.40–0.36)                          | 67                            | 0.12 (0.04–0.19)                             | 0.81 (0.45–1.48)                             | -0.04 (-0.12–0.03)                          |

Abbreviations: EPT, estrogen plus progestin therapy; ET, estrogen therapy; MHT, menopausal hormone therapy.

\* Adjusted for age, year, histology, comorbidities, and income.

**Supplementary Table S6.** Ever use of prediagnostic menopausal hormone therapy (MHT) prior to diagnosis of non-localized epithelial ovarian and fallopian tube cancer and 5- and 10-year relative survival probabilities. The analysis is restricted to the study population 2005–2014 and with additional adjustment for smoking and body mass index (BMI).

|                           | N   | Crude relative survival probability (95% CI) | Adj. relative survival probability* (95% CI) | Relative survival probability with additional adjustment for smoking and BMI (95% CI) |
|---------------------------|-----|----------------------------------------------|----------------------------------------------|---------------------------------------------------------------------------------------|
| <b>Pre-diagnostic use</b> |     |                                              |                                              |                                                                                       |
| <b>5-year survival</b>    |     |                                              |                                              |                                                                                       |
| Non-use of MHT            | 704 | Ref.                                         | Ref.                                         | Ref.                                                                                  |
| Ever use of MHT           | 592 | 1.13 (0.94–1.37)                             | 1.12 (0.93–1.35)                             | 1.12 (0.93–1.35)                                                                      |
| Non-use of MHT            | 704 | Ref.                                         | Ref.                                         | Ref.                                                                                  |
| Ever use of systemic ET   | 238 | 1.07 (0.83–1.37)                             | 1.13 (0.87–1.46)                             | 1.12 (0.86–1.46)                                                                      |
| Ever use of EPT           | 318 | 1.17 (0.94–1.46)                             | 1.09 (0.87–1.36)                             | 1.09 (0.87–1.36)                                                                      |
| Ever use of other MHT     | 36  | 1.25 (0.74–2.11)                             | 1.32 (0.84–2.10)                             | 1.33 (0.84–2.09)                                                                      |
| <b>10-year survival</b>   |     |                                              |                                              |                                                                                       |
| Non-use of MHT            | 704 | Ref.                                         | Ref.                                         | Ref.                                                                                  |
| Ever use of MHT           | 592 | 0.95 (0.72–1.25)                             | 0.91 (0.70–1.18)                             | 0.92 (0.71–1.19)                                                                      |
| Non-use of MHT            | 704 | Ref.                                         | Ref.                                         | Ref.                                                                                  |
| Ever use of systemic ET   | 238 | 0.86 (0.59–1.26)                             | 0.93 (0.65–1.34)                             | 0.94 (0.65–1.35)                                                                      |
| Ever use of EPT           | 318 | 1.02 (0.74–1.42)                             | 0.89 (0.65–1.23)                             | 0.90 (0.66–1.24)                                                                      |
| Ever use of other MHT     | 36  | 0.82 (0.36–1.86)                             | 0.93 (0.48–1.80)                             | 0.94 (0.49–1.80)                                                                      |

Abbreviations: BMI, body mass index; EPT, estrogen plus progestin therapy; ET, estrogen therapy; MHT, menopausal hormone therapy.

\* Adjusted for age, year, histology, comorbidities, and income.
